# Supplementary material for: The economic burden of malaria on households and the health system in a high transmission district of Mozambique
Source: Malar J. 2019 Nov 11;18:360. doi: 10.1186/s12936-019-2995-4 (PMC6849240; doi:10.1186/s12936-019-2995-4)
Supplement: Supplementary file 2 — Additional file 2. Description of 13 health facilities of Mopeia district. [file 12936_2019_2995_MOESM2_ESM.docx]

| **Additional file 2**.Description of 13 health facilities of Mopeia district. HF: health facility; RDT: rapid diagnostic test |
| --- |
| |  | |  | Freq | % |  |  | Freq | % | | --- | --- | --- | --- | --- | --- | --- | --- | --- | | ***Facilities*** |  | |  |  | ***Human resources*** |  |  |  | | Health Facility (HF) catchment area (population) | 0-5,000 | | 1 | 8% | # HF with medical doctor (general practitioner): *6 years of training (higher education)* | | 1 | 8% | |  | 5,001-10,000 | | 7 | 54% | # HF with medical doctor (preventive medicine): 6 *years of training (higher education)* | | 0 | 0% | |  | 10,001-15,000 | | 2 | 15% | # HF with medical technician (general medicine): *2.5 years of training (secondary education)* | | 6 | 46% | |  | 15,001-50,000 | | 0 | 0% | # HF with medical technician (preventive medicine): *2.5 years of training (secondary education)* | | 9 | 69% | |  | >50,000 | | 3 | 23% | # HF with nurse: *2.5 years of training (secondary education)* | | 13 | 100% | | Working hours | 7:00 to 15:00 | | 12 | 92% | # HF with pharmacist | | 4 | 31% | |  | 7:00 to 21:00 | | 1 | 8% | # HF with laboratory technician | | 3 | 23% | | # HF with more than 10 beds |  | | 1 | 8% | # HF with medical assistant: *1.5 years of training (secondary education)* | | 7 | 54% | | # HF with laboratory |  | | 3 | 31% | # HF with other worker: *(primary education)* | | 9 | 69% | | # HF with cars |  | | 2 | 15% |  |  |  |  | | # HF with motorbikes |  | | 1 | 8% |  |  |  |  | | ***Commodities*** |  | |  |  |  |  |  |  | | # HF with stock of RDT at time of survey |  | | 13 | 100% | # HF with stockout of AL 2x6 any day during last 3 months | | 9 | 69% | | # HF with stockout of RDT any day during last 3 months | | | 3 | 23% | # HF with stock of AL 3x6 at time of survey | | 10 | 77% | | # HF with stock of AL 1x6 at time of survey | | | 10 | 77% | # HF with stockout of AL 3x6 any day during last 3 months | | 9 | 69% | | # HF with stockout of AL 1x6 any day during last 3 months | | | 10 | 77% | # HF with stock of AL4x6 at time of survey | | 11 | 85% | | # HF with stock of AL 2x6 at time of survey | | | 11 | 85% | # HF with stockout of AL 4x6 any day during last 3 months | | 5 | 38% | |
